# Supplementary material for: Luminescent group 12 metal tetracarboxylate networks as probe for metal ions
Source: Royal Society of Chemistry journal article supplement (doi:10.1039/c4ra05275g), 2014-01-01
Supplement: c4ra05275g1.pdf [file c4ra05275g1.pdf]

## Luminescent Group 12 Metal Tetracarboxylate Networks for Probe Metal Ions

H. Y. Ren,<sup>a</sup> C. Y. Han,<sup>a</sup> M. Qu<sup>a</sup> and X. M. Zhang<sup>\*a</sup>

**Tab. S1** Bond lengths [Å] and angles [deg] for **1**

| Compound 1        |           |                   |           |
|-------------------|-----------|-------------------|-----------|
| Zn(1)-O(1)        | 1.971(2)  | Zn(1)-O(8a)       | 2.028 (2) |
| Zn(1)-O(7b)       | 2.043(2)  | Zn(1)-O(6c)       | 2.047(2)  |
| Zn(1)-O(5d)       | 2.072(2)  | Zn(1)...Zn(1e)    | 3.0268(5) |
| O(1)-Zn(1)-O(8a)  | 101.05(7) | O(1)-Zn(1)-O(7b)  | 101.20(7) |
| O(8a)-Zn(1)-O(7b) | 157.50(7) | O(1)-Zn(1)-O(6c)  | 107.52(7) |
| O(8a)-Zn(1)-O(6c) | 86.37(8)  | O(7b)-Zn(1)-O(6c) | 90.17(8)  |
| O(1)-Zn(1)-O(5d)  | 94.95(7)  | O(8a)-Zn(1)-O(5d) | 87.41(8)  |
| O(7b)-Zn(1)-O(5d) | 87.34(8)  | O(6c)-Zn(1)-O(5d) | 157.44(7) |

Symmetry codes: (a)=-x+1,-y+1,-z; (b)=x+1,y,z; (c)=x,y+1,z; (d)=-x+2,-y,-z; (e)=-x+2,-y+1,-z; (f)=x,y-1,z; (g)=-x-1,y,z

**Tab. S2** Bond lengths [Å] and angle [deg] for **2**

| Compound 2        |            |                  |            |
|-------------------|------------|------------------|------------|
| Cd(1)-O(1)        | 2.381(4)   | Cd(1)-O(2)       | 2.344(4)   |
| Cd(1)-O(4a)       | 2.236(4)   | Cd(1)-O(5)       | 2.448(4)   |
| Cd(1)-O(6)        | 2.370(5)   | Cd(1)-O(7b)      | 2.277(4)   |
| O(4a)-Cd(1)-O(7b) | 85.70(15)  | O(4a)-Cd(1)-O(2) | 115.32(16) |
| O(7b)-Cd(1)-O(2)  | 118.68(15) | O(4a)-Cd(1)-O(6) | 89.75(17)  |
| O(7b)-Cd(1)-O(6)  | 154.06(17) | O(2)-Cd(1)-O(6)  | 86.28(16)  |
| O(4a)-Cd(1)-O(1)  | 170.36(17) | O(7b)-Cd(1)-O(1) | 100.80(15) |
| O(6)-Cd(1)-O(1)   | 87.41(18)  | O(4a)-Cd(1)-O(5) | 98.05(17)  |
| O(7b)-Cd(1)-O(5)  | 101.30(14) | O(2)-Cd(1)-O(5)  | 128.28(14) |
| O(6)-Cd(1)-O(5)   | 54.08(15)  | O(1)-Cd(1)-O(5)  | 87.63(15)  |
| O(2)-Cd(1)-O(1)   | 55.31(15)  |                  |            |

Symmetry codes: (a)= x-1/2,-y+3/2,z-1/2; (b)= -x+2,-y+1,-z+1; (c)= -x+1,-y+1,-z+1; (d)= x+1/2,-y+3/2,z+1/2

**Tab. S3** Bond lengths [Å] and angle[deg] for **3**

| Compound 3        |           |                   |           |
|-------------------|-----------|-------------------|-----------|
| Cd(1)-O(9)        | 2.196(8)  | Cd(1)-O(1a)       | 2.254(8)  |
| Cd(1)-O(6)        | 2.260(6)  | Cd(1)-O(4)        | 2.280(5)  |
| Cd(1)-O(5)        | 2.554(7)  | Cd(1)-O(3)        | 2.603(8)  |
| Cd(1)-O(2a)       | 2.826(6)  | Cd(2)-O(1w)       | 2.070(15) |
| Cd(2)-O(13)       | 2.283(8)  | Cd(2)-O(2a)       | 2.305(8)  |
| Cd(2)-O(17)       | 2.357(14) | Cd(2)-O(10)       | 2.371(10) |
| Cd(2)-O(11)       | 2.407(7)  | Cd(3)-O(14)       | 2.184(8)  |
| Cd(3)-O(16b)      | 2.267(7)  | Cd(3)-O(7b)       | 2.345(6)  |
| Cd(3)-O(11)       | 2.351(6)  | Cd(3)-O(8b)       | 2.401(7)  |
| Cd(3)-O(12)       | 2.390(8)  |                   |           |
| O(1a)-Cd(1)-O(9)  | 109.3(4)  | O(9)-Cd(1)-O(6)   | 120.0(3)  |
| O(1a)-Cd(1)-O(6)  | 110.2(3)  | O(9)-Cd(1)-O(4)   | 86.4(3)   |
| O(1a)-Cd(1)-O(4)  | 91.4(3)   | O(6)-Cd(1)-O(4)   | 134.7(3)  |
| O(9)-Cd(1)-O(5)   | 167.4(4)  | O(4)-Cd(1)-O(5)   | 92.7(3)   |
| O(6)-Cd(1)-O(5)   | 53.4(2)   | O(9)-Cd(1)-O(3)   | 84.2(3)   |
| O(1a)-Cd(1)-O(3)  | 141.9(3)  | O(6)-Cd(1)-O(3)   | 91.2(2)   |
| O(4)-Cd(1)-O(3)   | 53.0(2)   | O(5)-Cd(1)-O(3)   | 85.3(3)   |
| O(1a)-Cd(1)-O(5)  | 83.3(3)   | O(1w)-Cd(2)-O(11) | 84.9(3)   |
| O(1w)-Cd(2)-O(10) | 87.6(4)   | O(1w)-Cd(2)-O(13) | 89.0(4)   |
| O(1w)-Cd(2)-O(2a) | 88.6(3)   | O(13)-Cd(2)-O(2a) | 95.6(3)   |
| O(1w)-Cd(2)-O(17) | 175.6(5)  | O(13)-Cd(2)-O(17) | 94.7(5)   |
| O(2a)-Cd(2)-O(17) | 93.3(5)   | O(2a)-Cd(2)-O(11) | 173.1(2)  |
| O(13)-Cd(2)-O(10) | 176.4(4)  | O(2a)-Cd(2)-O(10) | 83.7(3)   |

|                    |          |                    |          |
|--------------------|----------|--------------------|----------|
| O(17)-Cd(2)-O(10)  | 88.7(5)  | O(17)-Cd(2)-O(11)  | 93.3(5)  |
| O(13)-Cd(2)-O(11)  | 81.9(2)  | O(10)-Cd(2)-O(11)  | 98.4(3)  |
| O(14)-Cd(3)-O(16b) | 90.0(3)  | O(14)-Cd(3)-O(7b)  | 93.9(3)  |
| O(16b)-Cd(3)-O(7b) | 111.7(3) | O(14)-Cd(3)-O(11)  | 106.3(3) |
| O(16b)-Cd(3)-O(11) | 87.4(3)  | O(7b)-Cd(3)-O(11)  | 152.4(2) |
| O(14)-Cd(3)-O(12)  | 161.0(3) | O(16b)-Cd(3)-O(12) | 84.2(3)  |
| O(7b)-Cd(3)-O(12)  | 105.0(2) | O(11)-Cd(3)-O(12)  | 55.5(2)  |
| O(14)-Cd(3)-O(8b)  | 95.9(3)  | O(16b)-Cd(3)-O(8b) | 165.4(3) |
| O(7b)-Cd(3)-O(8b)  | 54.6(2)  | O(11)-Cd(3)-O(8b)  | 103.7(2) |
| O(12)-Cd(3)-O(8b)  | 94.1(3)  |                    |          |

Symmetry codes: (a)=x-1, y, z; (b)=-x+1, -y+1, -z+2; (c)=x+1, y, z; (d)=-x+2, -y, -z+1; (e)=-x+1, -y, -z+2; (f)=-x+2, -y+1, -z+1; (g)=-x, -y+1, -z+2

**Tab. S4** Distances (Å) and angles (deg) of the hydrogen bond interactions in **1**

| D-H...A                | d(D-H) | d(H...A) | d(D...A) | ∠(D-H...A) |
|------------------------|--------|----------|----------|------------|
| 2 N(1) - H(1A) ..O(3d) | 0.90   | 1.76     | 2.6533   | 174        |
| 2 N(1) - H(1B) ..O(3a) | 0.90   | 1.88     | 2.7392   | 158        |
| 3 N(2) - H(2A) ..O(2)  | 0.90   | 1.88     | 2.7462   | 161        |
| 3 N(2) - H(2B) ..O(4b) | 0.90   | 1.81     | 2.7006   | 169        |

Symmetry codes: (a) = -x+1, y, z; (b) = x, 1+y, z; (c) = 1-x, 1-y, 1-z; (d) = 1-x, -y, 1-z;

**Tab. S5** Distances (Å) and angles (deg) of the hydrogen bond interactions in **2**

| D-H...A               | d(D-H) | d(H...A) | d(D...A) | ∠(D-H...A) |
|-----------------------|--------|----------|----------|------------|
| O1w - H1wA .. O(4b)   | 0.83   | 2.04     | 2.8475   | 165        |
| N(1) - H(1A) .. O(3)  | 0.90   | 2.09     | 2.8841   | 146        |
| N(1) - H(1A) .. O(2b) | 0.90   | 2.47     | 2.9198   | 111        |
| N(1) - H(1B) .. O1w   | 0.90   | 1.94     | 2.8018   | 158        |
| O1w - H1wB .. O(8)    | 0.81   | 1.89     | 2.7362   | 165        |
| N(2) - H(2A) .. O(1)  | 0.90   | 2.35     | 3.0428   | 133        |
| N(2) - H(2A) .. O(8a) | 0.90   | 2.27     | 2.9783   | 135        |
| N(2) - H(2B) .. O(5c) | 0.90   | 1.98     | 2.7903   | 150        |

Symmetry codes: (a) = -1/2+x, 1/2-y, -1/2+z; (b) = 1/2-x, -1/2+y, 1/2-z; (c) = 1+x, y, z

**Tab. S6** Distances (Å) and angles (deg) of the hydrogen bond interactions in **3**

| D-H...A              | d(D-H) | d(H...A) | d(D...A) | ∠(D-H...A) |
|----------------------|--------|----------|----------|------------|
| O1W - H(1WA) ..O(16) | 1.10   | 1.84     | 2.806    | 145        |
| O1W - H(1WB) ..O(6)  | 1.09   | 1.69     | 2.692    | 151        |
| N(1) - H(1A) ..O(7)  | 0.90   | 2.10     | 2.826    | 137        |
| N(1) - H(1B)..O(15)  | 0.90   | 1.87     | 2.692    | 151        |

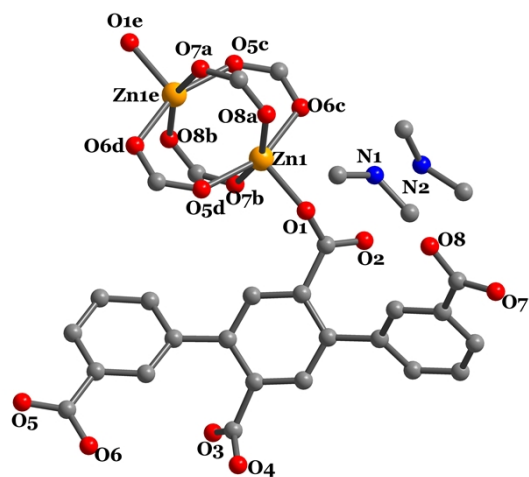

Fig. S1 Views of the coordination environments of Zn(II) atoms and organic  $[\text{Me}_2\text{NH}_2]^+$  cation in **1**

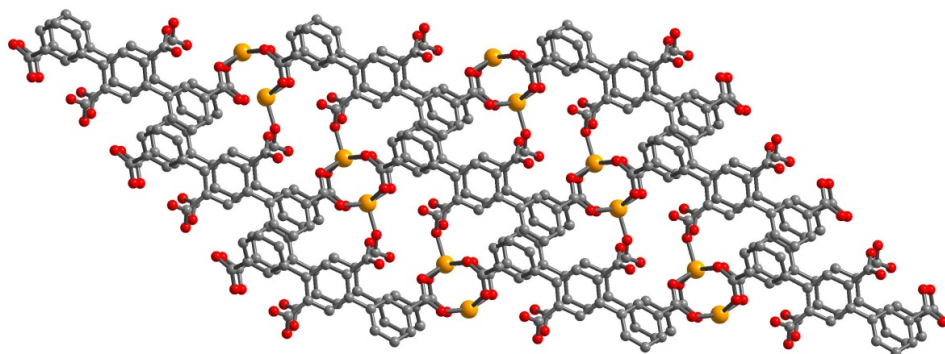

Fig. S2 Perspective view of the 3D supramolecular array of **1**

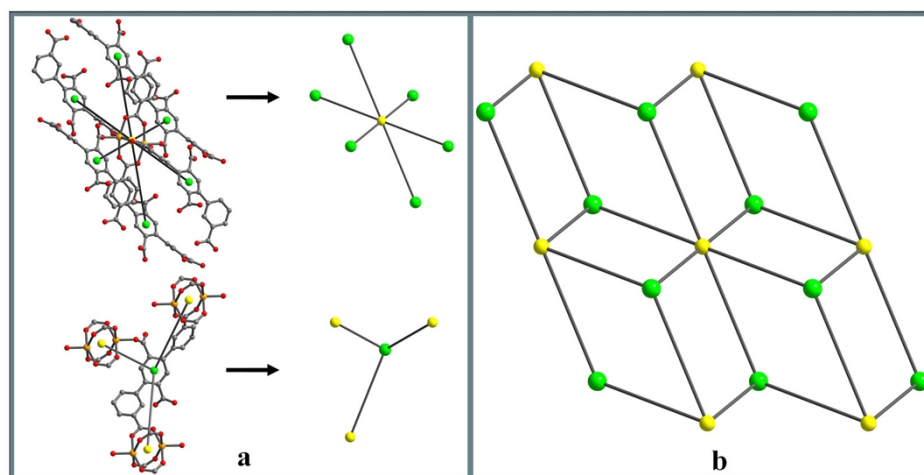

Fig. S3 (a). Tetratopic and tritopic linkers in **1**. (b). Schematic representation of the kgd net in **1**.

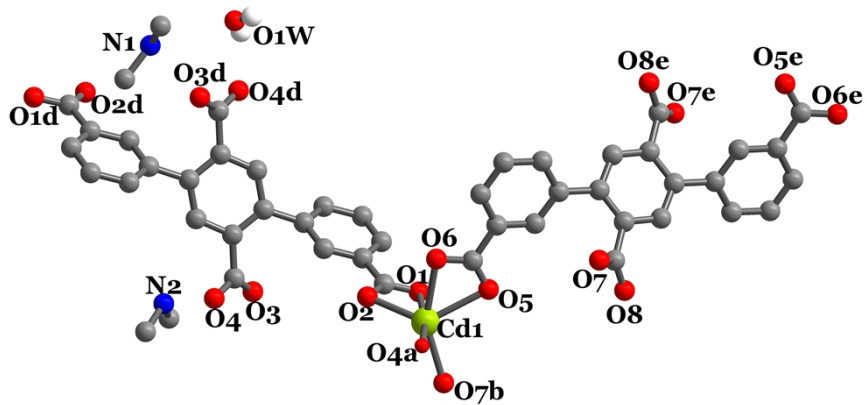

Fig. S4 Views of the coordination environments of Cd(II) atoms and organic  $[\text{Me}_2\text{NH}_2]^+$  cation in **2**

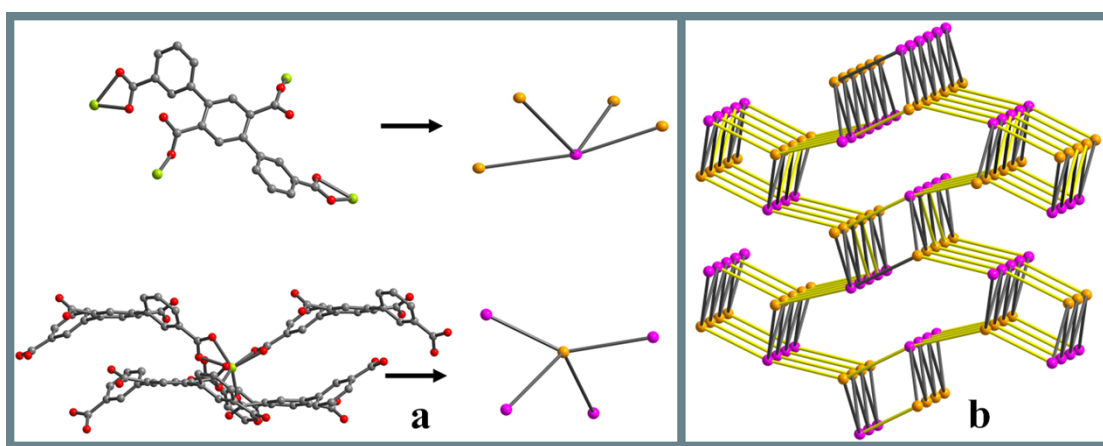

Fig. S5 (a). Two tetratopic linkers in **2**. (b). Schematic representations of the 4-connected sra framework in **2**

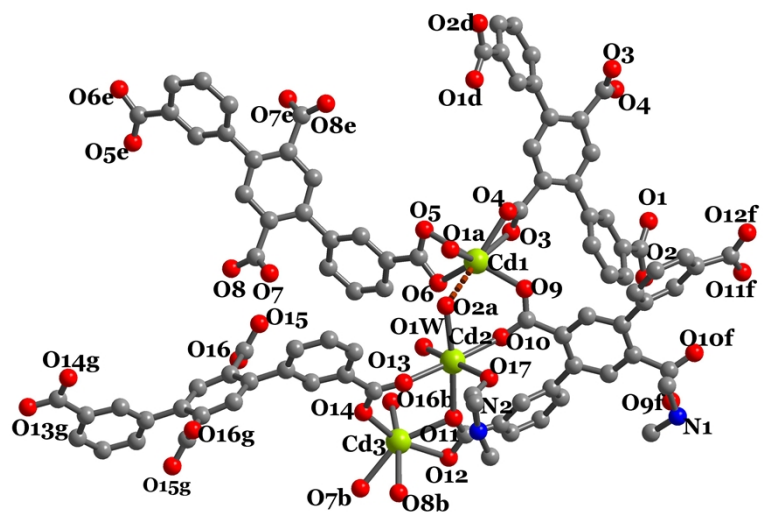

Fig. S6 Views of the coordination environments of Cd(II) atoms in **3**.

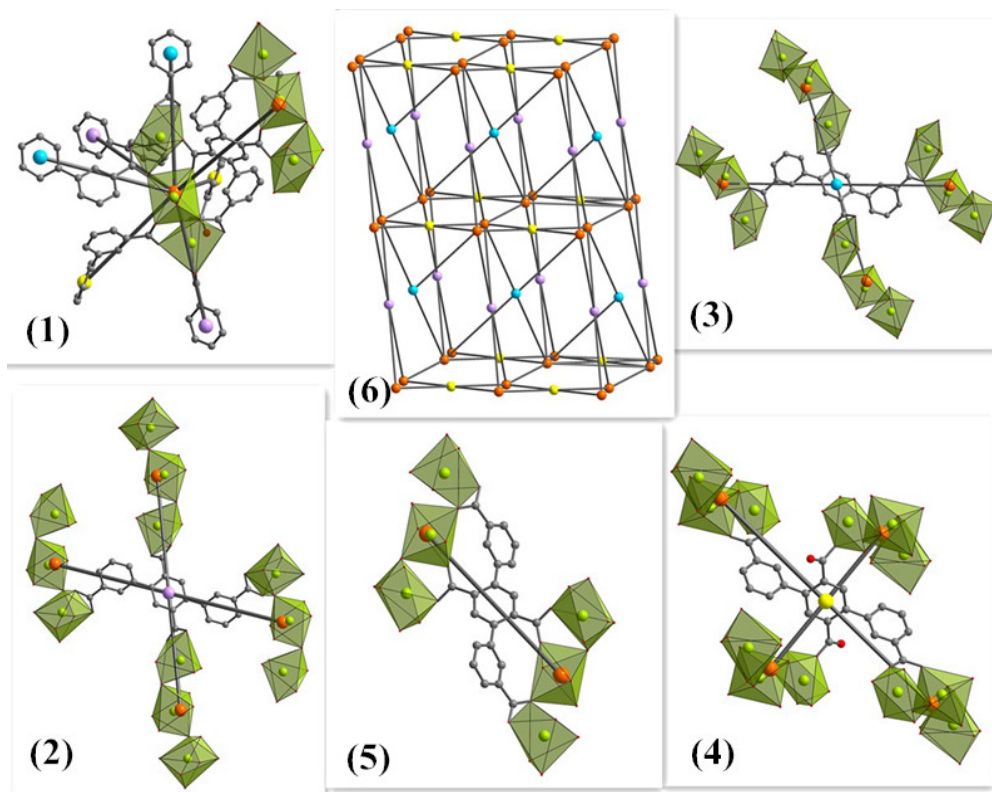

**Fig. S7** (1-4). The list of one 7-c node and three 4-c nodes in **3**; (5). The  $\text{tpta}^{4+}$  as linker; (6). Schematic representations of framework in **3**

**Tab. S6** Solid-state emission and excitation from 4K to 298K for **1-3**

| Compound            | Temperature(K) | $\lambda_{\text{ex}}$ | $\lambda_{\text{em1}}$ | $\lambda_{\text{em2}}$ |
|---------------------|----------------|-----------------------|------------------------|------------------------|
| H <sub>4</sub> TPTA | 298            | 367                   | 435                    | 462                    |
|                     | 4              | 374                   | 420                    | 467                    |
| 1                   | 100            | 374                   | 430                    | 467                    |
|                     | 200            | 374                   | 439                    | 467                    |
|                     | 298            | 374                   | 443                    | 467                    |
|                     | 4              | 377                   | 410.5                  | 470                    |
| 2                   | 100            | 377                   | 417                    | 470                    |
|                     | 200            | 377                   | 424                    | 468.5                  |
|                     | 298            | 377                   | 446                    | 470                    |
|                     | 4              | 378                   | 408                    | 467                    |
| 3                   | 100            | 378                   | 412                    | 467                    |
|                     | 150            | 378                   | 425                    | 467                    |
|                     | 200            | 378                   | 427                    | 467                    |
|                     | 250            | 378                   | 434                    | 467                    |
|                     | 298            | 378                   | 439                    | 467                    |

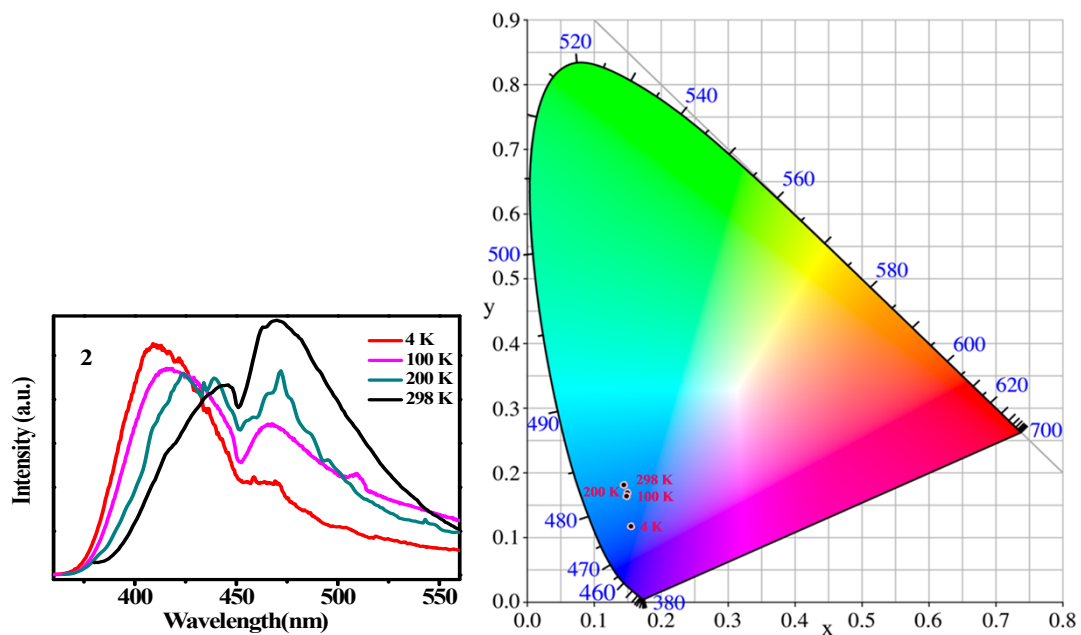

**Fig. S8** (a) Emission spectra of **2** from 4K to 298K with  $\lambda_{\text{ex}} = 377$  nm; (b) The CIE coordinates (marked by the circles) for **2** at various temperature

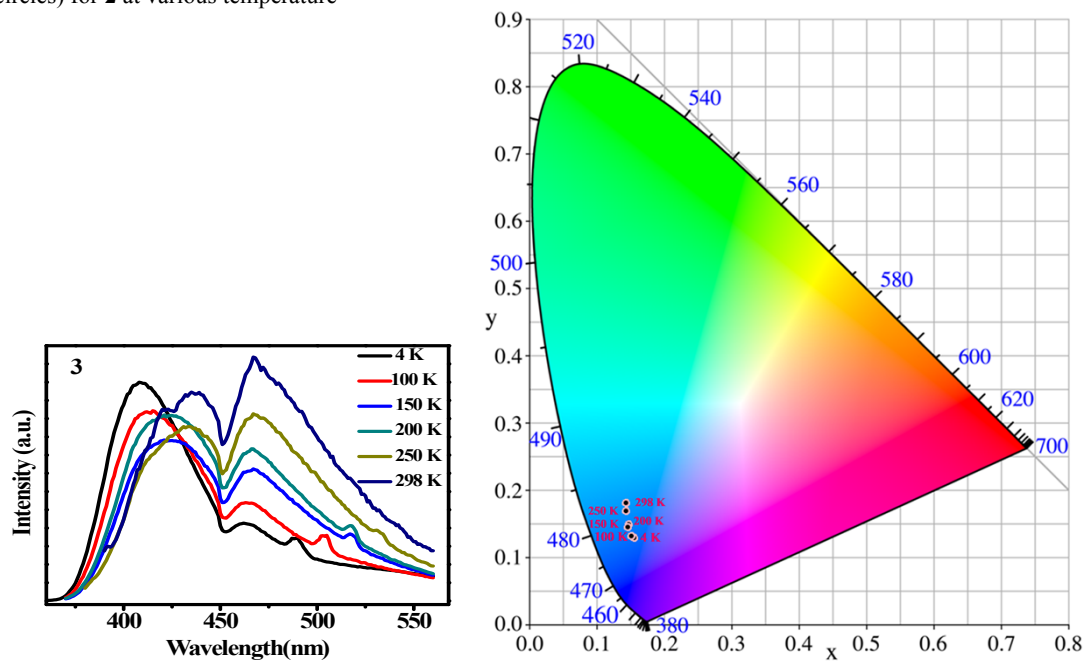

**Fig. S9** (a) emission spectra of **3** from 4k to 298k with  $\lambda_{\text{ex}} = 378$  nm; (b) The CIE coordinates (marked by the circles) for **3** at various temperature

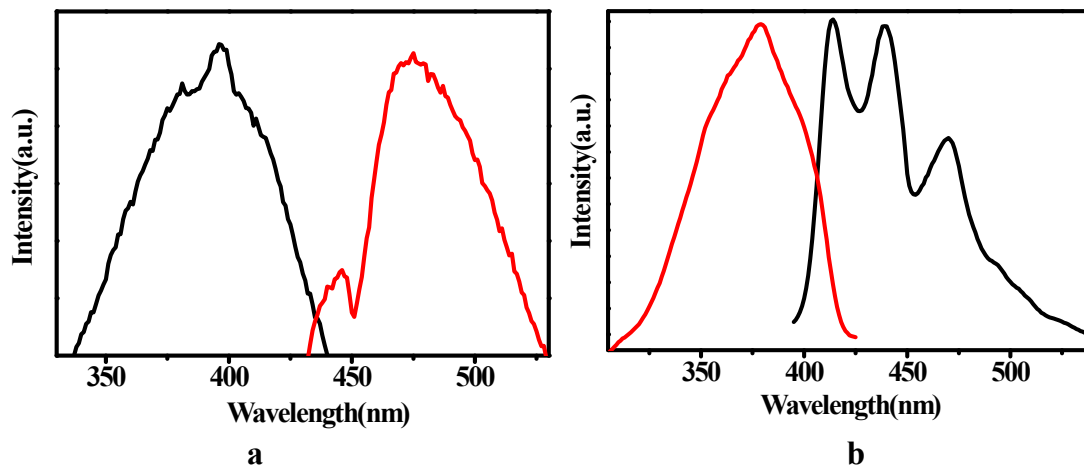

**Fig. S10** (a). Emission and excitation spectra of H<sub>4</sub>tpta: excitation spectrum ( $\lambda_{\text{max}} = 396$  nm) (black) and emission spectrum ( $\lambda_{\text{max}} = 475$  nm) (red) in pyridine; (b). Emission and excitation spectra of H<sub>4</sub>tpta: excitation spectrum ( $\lambda_{\text{max}} = 379$  nm) (red) and emission spectrum (central peak at around 440 nm additional peaks at higher 470 nm and lower wavelengths at 414nm) (black) in 1,2,4-trichlorobenzene

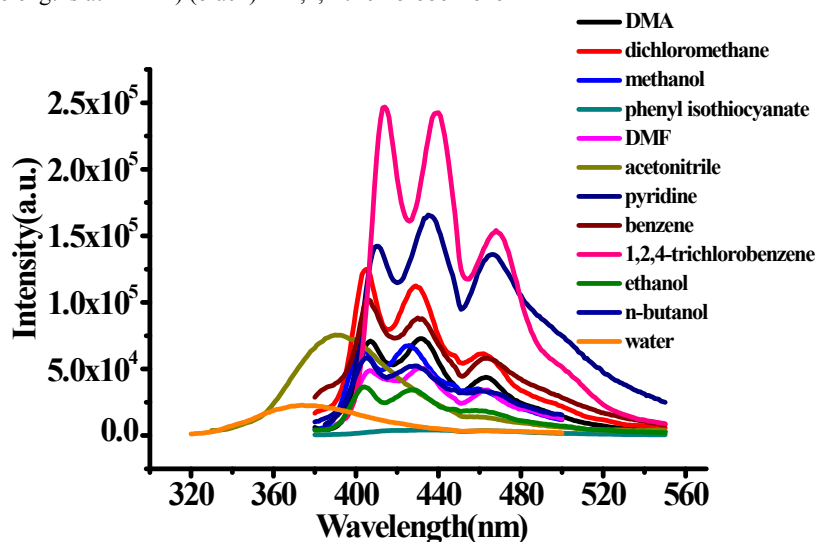

**Fig. S11** Phosphorescence emission changes of 2 in different solvents.

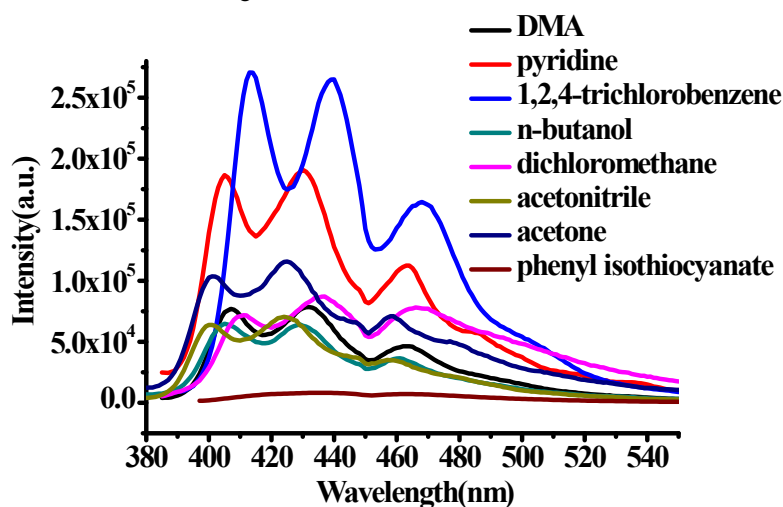

**Fig. S12** Phosphorescence emission changes of 3 in different solvents

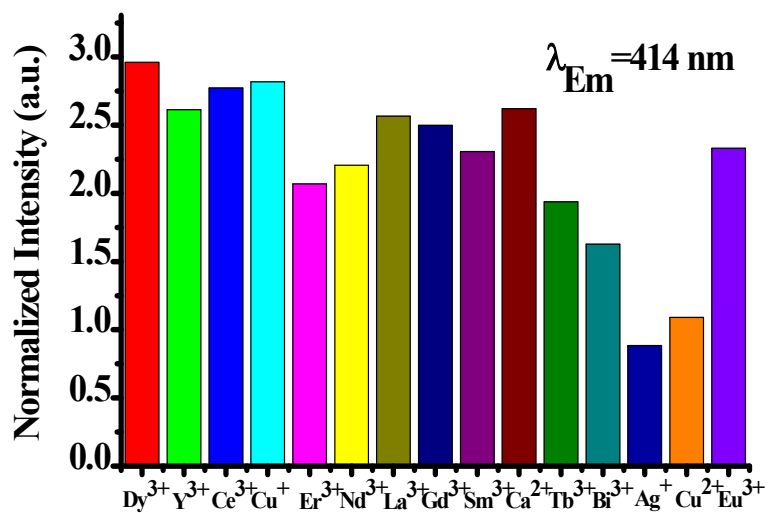

Fig. S13 Phosphorescence response of 2 to various cations.

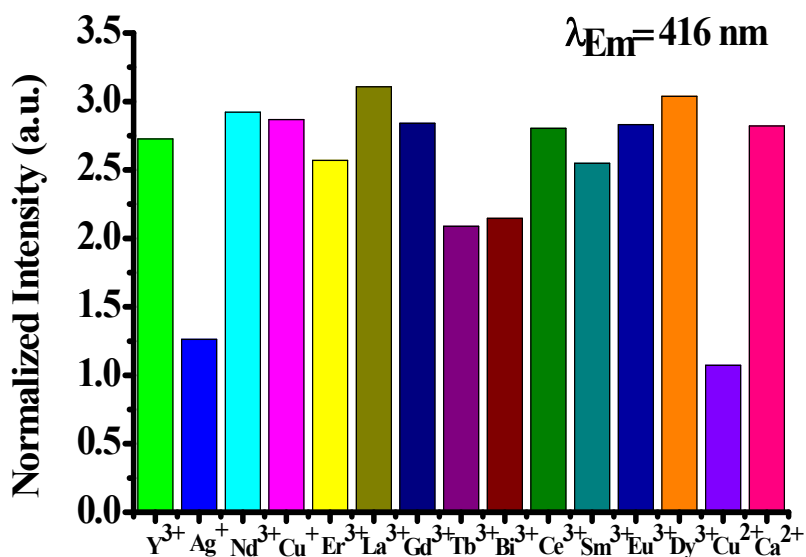

Fig. S14 Phosphorescence response of 3 to various cations.

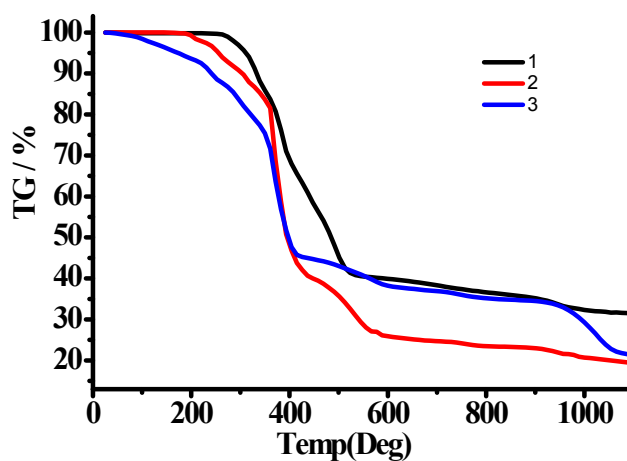

Fig. S15 TGA curve of 1–3 in air at the heating rate of 10 °C min<sup>-1</sup>



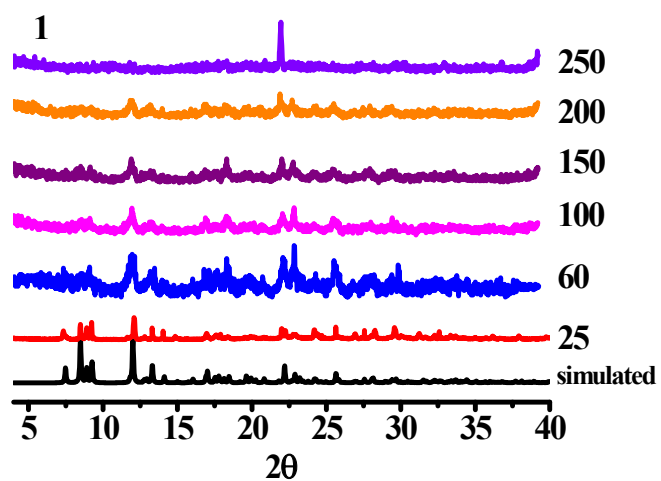

Fig. S16 Powder X-ray diffraction pattern of 1: Experimental result (red), Simulated pattern (black)

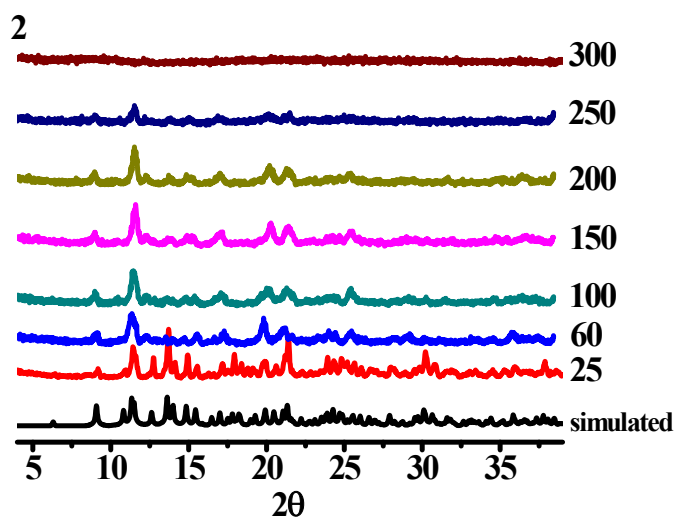

Fig. S17 Powder X-ray diffraction pattern of 2: Experimental result (red), Simulated pattern (black)

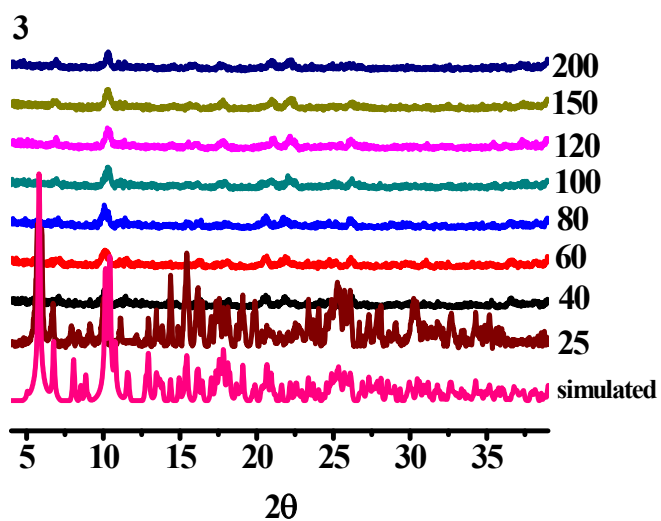

Fig. S18 Powder X-ray diffraction pattern of 3: Experimental result (red), Simulated pattern (black)

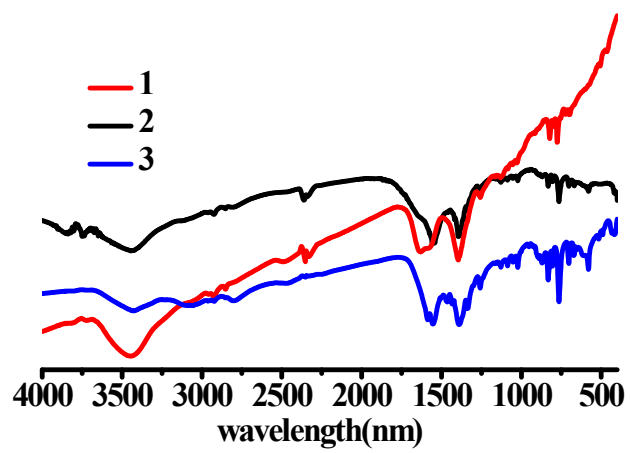

Fig. S19 IR spectra of the pristine 1-3
